# Supplementary material
Source: PubMed Central journal article supplement (PMC1800699)
Supplement: molcellb_27_3_963__1.pdf [file molcellb_27_3_963__1.pdf]

## Supplementary data

**Table 1S.** Summary of yeast two-hybrid analysis of interactions between Mod(mdg4)-67.2 or Mod(mdg4) mutants and Su(Hw)<sup>MID</sup>

| Interacting proteins      |                           | Strength of interaction    |                            |
|---------------------------|---------------------------|----------------------------|----------------------------|
| GAL4BD                    | GAL4AD                    | AD fused before<br>protein | AD fused behind<br>protein |
| Su(Hw) <sup>MID</sup>     | Su(Hw) <sup>MID</sup>     | -                          | ND                         |
| Mod(mdg4)                 | Su(Hw) <sup>MID</sup>     | +++                        | ND                         |
| Su(Hw) <sup>MID</sup>     | Mod(mdg4)                 | +++                        | +++                        |
| Mod(mdg4) <sup>ΔBTB</sup> | Su(Hw) <sup>MID</sup>     | +++                        | ND                         |
| Su(Hw) <sup>MID</sup>     | Mod(mdg4) <sup>ΔBTB</sup> | ++                         | +++                        |
| Su(Hw) <sup>MID</sup>     | ModD33N/H46D              | +                          | +++                        |
| ModD33N/H46D              | Su(Hw) <sup>MID</sup>     | +++                        | ND                         |
| Su(Hw) <sup>MID</sup>     | ModR47Q                   | ++                         | +++                        |
| ModR47Q                   | Su(Hw) <sup>MID</sup>     | +++                        | ND                         |
| Su(Hw) <sup>MID</sup>     | ModD33N                   | +                          | +++                        |
| ModD33N                   | Su(Hw) <sup>MID</sup>     | +++                        | ND                         |
| Su(Hw) <sup>MID</sup>     | ModD33N/R47Q              | ++                         | +++                        |
| ModD33N/R47Q              | Su(Hw) <sup>MID</sup>     | +++                        | ND                         |
| Su(Hw) <sup>MID</sup>     | ModH46D                   | +                          | +++                        |
| ModH46D                   | Su(Hw) <sup>MID</sup>     | +++                        | ND                         |
| Su(Hw) <sup>MID</sup>     | Mod(mdg4) <sup>GAF</sup>  | +++                        | +++                        |
| Mod(mdg4) <sup>GAF</sup>  | Su(Hw) <sup>MID</sup>     | +++                        | ND                         |

No growth occurred after transformation with single plasmids, indicating that interactions between the proteins are required for expression of the reporter genes (data not shown). The GAL4 activator domain (AD) is fused in front of or behind the tested protein. Symbol “+” refers to the relative strength of two-

hybrid interaction. The symbol “-“ indicates the absence of interaction. ND, this combination was not determined. Equivalent expression of the chimeric proteins in yeast was confirmed by immunoblotting with GAL4 BD or AD monoclonal antibodies (data not shown).

## Figure legend

**Figure 1S.** The effect of the mutant Mod(mdg4) proteins on the phenotype of the mutations in AS-C. Phenotypes of the indicated *sc* mutations were examined in males. All mutant Mod(mdg4) proteins were expressed in the *mod(mdg4)<sup>u1</sup>* or *mod(mdg4)<sup>T6</sup>* background. Flies expressing ModS25A/D33Q, Mod(mdg4)<sup>ΔBTB</sup> and ModD33N display *sc* phenotype like control *mod(mdg4)<sup>u1</sup>/mod(mdg4)<sup>u1</sup>* flies, while flies expressing ModR47Q and Mod(mdg4)-67.2 had similar *sc* phenotypes (data not shown). The standard nomenclature for each bristle is indicated as follows (Lindsley and Zimm, 1992): HU, humeral; AOR, anterior orbital; PS, presutural; ASA, anterior supra-alar; OC, ocellar; PV, postvertical; ANP, anterior notopleural; SC, scutellar; ADC, anterior dorsocentral; PDC, posterior dorsocentral; AVT, anterior vertical; MC, the rows of microchaetae on the notum. Only the bristles affected in the *ac* and *sc* mutations are shown. Empty boxes indicate that the corresponding bristles are present (wild-type phenotype). One-fourth-full, half-full and full filled boxes mean that the corresponding bristle(s) is(are) absent in over 10%, 50% or 90% of the flies, respectively. For scutellars, boxes one-fourth-full, half-full and full mean that 3-4, 2-3 or 0-1 scutellar bristles, respectively, are present. Their number was determined by the average among about 100 scored flies.

| Genotypes                     | SC                       |                          |                          |                                     |                                     |                                     |                                     | AC                                  |                          |                          |                          |
|-------------------------------|--------------------------|--------------------------|--------------------------|-------------------------------------|-------------------------------------|-------------------------------------|-------------------------------------|-------------------------------------|--------------------------|--------------------------|--------------------------|
|                               | HU                       | ASA                      | PS                       | AOR                                 | OC                                  | PV                                  | ANP                                 | SC                                  | MC                       | A/P                      | DC                       |
| $SC^{D1}; +/+$                | <input type="checkbox"/> | <input type="checkbox"/> | <input type="checkbox"/> | <input checked="" type="checkbox"/> | <input type="checkbox"/> | <input type="checkbox"/> | <input type="checkbox"/> |
| $mod(mdg)^{u1}/mod(mdg)^{u1}$ | <input type="checkbox"/> | <input type="checkbox"/> | <input type="checkbox"/> | <input checked="" type="checkbox"/> | <input type="checkbox"/>            | <input checked="" type="checkbox"/> | <input checked="" type="checkbox"/> | <input checked="" type="checkbox"/> | <input type="checkbox"/> | <input type="checkbox"/> | <input type="checkbox"/> |
| Mod(mdg)-67,2                 | <input type="checkbox"/> | <input type="checkbox"/> | <input type="checkbox"/> | <input checked="" type="checkbox"/> | <input type="checkbox"/> | <input type="checkbox"/> | <input type="checkbox"/> |
| Mod(mdg4) <sup>ΔBTB</sup>     | <input type="checkbox"/> | <input type="checkbox"/> | <input type="checkbox"/> | <input checked="" type="checkbox"/> | <input type="checkbox"/>            | <input checked="" type="checkbox"/> | <input checked="" type="checkbox"/> | <input checked="" type="checkbox"/> | <input type="checkbox"/> | <input type="checkbox"/> | <input type="checkbox"/> |
| Mod(mdg4) <sup>ΔDD</sup>      | <input type="checkbox"/> | <input type="checkbox"/> | <input type="checkbox"/> | <input checked="" type="checkbox"/> | <input type="checkbox"/> | <input type="checkbox"/> | <input type="checkbox"/> |
| Mod(mdg4) <sup>GAF</sup>      | <input type="checkbox"/> | <input type="checkbox"/> | <input type="checkbox"/> | <input checked="" type="checkbox"/> | <input type="checkbox"/>            | <input checked="" type="checkbox"/> | <input checked="" type="checkbox"/> | <input checked="" type="checkbox"/> | <input type="checkbox"/> | <input type="checkbox"/> | <input type="checkbox"/> |
| Mod D33N                      | <input type="checkbox"/> | <input type="checkbox"/> | <input type="checkbox"/> | <input checked="" type="checkbox"/> | <input type="checkbox"/>            | <input checked="" type="checkbox"/> | <input checked="" type="checkbox"/> | <input checked="" type="checkbox"/> | <input type="checkbox"/> | <input type="checkbox"/> | <input type="checkbox"/> |
| Mod H46D                      | <input type="checkbox"/> | <input type="checkbox"/> | <input type="checkbox"/> | <input checked="" type="checkbox"/> | <input type="checkbox"/>            | <input checked="" type="checkbox"/> | <input checked="" type="checkbox"/> | <input checked="" type="checkbox"/> | <input type="checkbox"/> | <input type="checkbox"/> | <input type="checkbox"/> |
| Mod R47Q                      | <input type="checkbox"/> | <input type="checkbox"/> | <input type="checkbox"/> | <input checked="" type="checkbox"/> | <input type="checkbox"/> | <input type="checkbox"/> | <input type="checkbox"/> |
| Mod D33N/R47Q                 | <input type="checkbox"/> | <input type="checkbox"/> | <input type="checkbox"/> | <input checked="" type="checkbox"/> | <input type="checkbox"/> | <input type="checkbox"/> | <input type="checkbox"/> |
| Mod D33N/H46D                 | <input type="checkbox"/> | <input type="checkbox"/> | <input type="checkbox"/> | <input checked="" type="checkbox"/> | <input type="checkbox"/> | <input type="checkbox"/> | <input type="checkbox"/> |
| Mod D33N/H46D <sup>ΔDD</sup>  | <input type="checkbox"/> | <input type="checkbox"/> | <input type="checkbox"/> | <input checked="" type="checkbox"/> | <input type="checkbox"/>            | <input checked="" type="checkbox"/> | <input checked="" type="checkbox"/> | <input checked="" type="checkbox"/> | <input type="checkbox"/> | <input type="checkbox"/> | <input type="checkbox"/> |

|                               |                                     |                                     |                                     |                                     |                          |                          |                          |                          |                          |                          |                          |
|-------------------------------|-------------------------------------|-------------------------------------|-------------------------------------|-------------------------------------|--------------------------|--------------------------|--------------------------|--------------------------|--------------------------|--------------------------|--------------------------|
| $SC^{ms}; +/+$                | <input checked="" type="checkbox"/> | <input checked="" type="checkbox"/> | <input checked="" type="checkbox"/> | <input checked="" type="checkbox"/> | <input type="checkbox"/> |
| $mod(mdg)^{u1}/mod(mdg)^{u1}$ | <input checked="" type="checkbox"/> | <input type="checkbox"/>            | <input type="checkbox"/>            | <input checked="" type="checkbox"/> | <input type="checkbox"/> |
| Mod(mdg)-67,2                 | <input checked="" type="checkbox"/> | <input checked="" type="checkbox"/> | <input checked="" type="checkbox"/> | <input checked="" type="checkbox"/> | <input type="checkbox"/> |
| Mod(mdg4) <sup>ΔBTB</sup>     | <input checked="" type="checkbox"/> | <input type="checkbox"/>            | <input checked="" type="checkbox"/> | <input checked="" type="checkbox"/> | <input type="checkbox"/> |
| Mod(mdg4) <sup>ΔDD</sup>      | <input checked="" type="checkbox"/> | <input checked="" type="checkbox"/> | <input checked="" type="checkbox"/> | <input checked="" type="checkbox"/> | <input type="checkbox"/> |
| Mod(mdg4) <sup>GAF</sup>      | <input checked="" type="checkbox"/> | <input type="checkbox"/>            | <input checked="" type="checkbox"/> | <input checked="" type="checkbox"/> | <input type="checkbox"/> |
| Mod D33N                      | <input checked="" type="checkbox"/> | <input type="checkbox"/>            | <input checked="" type="checkbox"/> | <input checked="" type="checkbox"/> | <input type="checkbox"/> |
| Mod H46D                      | <input checked="" type="checkbox"/> | <input checked="" type="checkbox"/> | <input type="checkbox"/>            | <input type="checkbox"/>            | <input type="checkbox"/> | <input type="checkbox"/> | <input type="checkbox"/> | <input type="checkbox"/> | <input type="checkbox"/> | <input type="checkbox"/> | <input type="checkbox"/> |
| Mod R47Q                      | <input checked="" type="checkbox"/> | <input checked="" type="checkbox"/> | <input checked="" type="checkbox"/> | <input checked="" type="checkbox"/> | <input type="checkbox"/> |
| Mod D33N/ R47Q                | <input checked="" type="checkbox"/> | <input checked="" type="checkbox"/> | <input checked="" type="checkbox"/> | <input checked="" type="checkbox"/> | <input type="checkbox"/> |
| Mod D33N/ H46D                | <input checked="" type="checkbox"/> | <input checked="" type="checkbox"/> | <input checked="" type="checkbox"/> | <input checked="" type="checkbox"/> | <input type="checkbox"/> |
| Mod D33N/H46D <sup>ΔDD</sup>  | <input checked="" type="checkbox"/> | <input type="checkbox"/>            | <input checked="" type="checkbox"/> | <input checked="" type="checkbox"/> | <input type="checkbox"/> |

|                               |                                     |                                     |                                     |                                     |                          |                                     |                                     |                                     |                                     |                                     |                                     |
|-------------------------------|-------------------------------------|-------------------------------------|-------------------------------------|-------------------------------------|--------------------------|-------------------------------------|-------------------------------------|-------------------------------------|-------------------------------------|-------------------------------------|-------------------------------------|
| $SC^{v2}; +/+$                | <input type="checkbox"/>            | <input type="checkbox"/>            | <input type="checkbox"/>            | <input type="checkbox"/>            | <input type="checkbox"/> | <input type="checkbox"/>            | <input type="checkbox"/>            | <input checked="" type="checkbox"/> | <input type="checkbox"/>            | <input type="checkbox"/>            | <input type="checkbox"/>            |
| $mod(mdg)^{u1}/mod(mdg)^{u1}$ | <input checked="" type="checkbox"/> | <input checked="" type="checkbox"/> | <input checked="" type="checkbox"/> | <input checked="" type="checkbox"/> | <input type="checkbox"/> | <input checked="" type="checkbox"/> | <input type="checkbox"/>            |
| Mod(mdg)-67,2                 | <input type="checkbox"/>            | <input type="checkbox"/>            | <input type="checkbox"/>            | <input checked="" type="checkbox"/> | <input type="checkbox"/> | <input type="checkbox"/>            | <input type="checkbox"/>            | <input checked="" type="checkbox"/> | <input type="checkbox"/>            | <input type="checkbox"/>            | <input type="checkbox"/>            |
| Mod(mdg4) <sup>ΔBTB</sup>     | <input checked="" type="checkbox"/> | <input checked="" type="checkbox"/> | <input checked="" type="checkbox"/> | <input checked="" type="checkbox"/> | <input type="checkbox"/> | <input checked="" type="checkbox"/> |
| Mod(mdg4) <sup>ΔDD</sup>      | <input checked="" type="checkbox"/> | <input checked="" type="checkbox"/> | <input checked="" type="checkbox"/> | <input checked="" type="checkbox"/> | <input type="checkbox"/> | <input checked="" type="checkbox"/> | <input type="checkbox"/>            |
| Mod(mdg4) <sup>GAF</sup>      | <input checked="" type="checkbox"/> | <input checked="" type="checkbox"/> | <input checked="" type="checkbox"/> | <input checked="" type="checkbox"/> | <input type="checkbox"/> | <input checked="" type="checkbox"/> |
| Mod D33N                      | <input checked="" type="checkbox"/> | <input checked="" type="checkbox"/> | <input checked="" type="checkbox"/> | <input checked="" type="checkbox"/> | <input type="checkbox"/> | <input checked="" type="checkbox"/> |
| Mod H46D                      | <input checked="" type="checkbox"/> | <input checked="" type="checkbox"/> | <input checked="" type="checkbox"/> | <input checked="" type="checkbox"/> | <input type="checkbox"/> | <input checked="" type="checkbox"/> |
| Mod R47Q                      | <input type="checkbox"/>            | <input type="checkbox"/>            | <input type="checkbox"/>            | <input checked="" type="checkbox"/> | <input type="checkbox"/> | <input type="checkbox"/>            | <input type="checkbox"/>            | <input checked="" type="checkbox"/> | <input type="checkbox"/>            | <input type="checkbox"/>            | <input type="checkbox"/>            |
| Mod D33N/ R47Q                | <input type="checkbox"/>            | <input type="checkbox"/>            | <input checked="" type="checkbox"/> | <input checked="" type="checkbox"/> | <input type="checkbox"/> | <input type="checkbox"/>            | <input type="checkbox"/>            | <input checked="" type="checkbox"/> | <input checked="" type="checkbox"/> | <input checked="" type="checkbox"/> | <input checked="" type="checkbox"/> |
| Mod D33N/ H46D                | <input type="checkbox"/>            | <input type="checkbox"/>            | <input checked="" type="checkbox"/> | <input checked="" type="checkbox"/> | <input type="checkbox"/> | <input type="checkbox"/>            | <input type="checkbox"/>            | <input checked="" type="checkbox"/> | <input type="checkbox"/>            | <input type="checkbox"/>            | <input type="checkbox"/>            |
| Mod D33N/H46D <sup>ΔDD</sup>  | <input checked="" type="checkbox"/> | <input checked="" type="checkbox"/> | <input checked="" type="checkbox"/> | <input checked="" type="checkbox"/> | <input type="checkbox"/> | <input checked="" type="checkbox"/> |
